# Supplementary material for: Electrochemical determination of metformin via a carbon paste electrode modified with an Ag NPs/Cu2O/CuO-decorated bacterial nanocellulose composite
Source: Royal Society of Chemistry journal article supplement (doi:10.1039/d3ay00703k), 2023-01-01
Supplement: d3ay00703k1.pdf [file d3ay00703k1.pdf]

**Electrochemical determination of metformin via carbon paste electrode  
modified with Ag NPs/Cu<sub>2</sub>O/CuO-decorated bacterial nanocellulose  
composite**

S. Zamani<sup>1</sup>, Kh. Ghanbari\*<sup>1</sup>, S. Bonyadi<sup>1</sup>

*<sup>1</sup>Department of Analytical Chemistry, Faculty of Chemistry, Alzahra University, P. O. Box 1993893973,  
Tehran, Iran.*

---

\*Corresponding author. Tel.: +98 21 88044040; fax: +98 21 88035187.  
E-mail address: kh.ghanbari@alzahra.ac.ir (kh\_ghanb@yahoo.com).

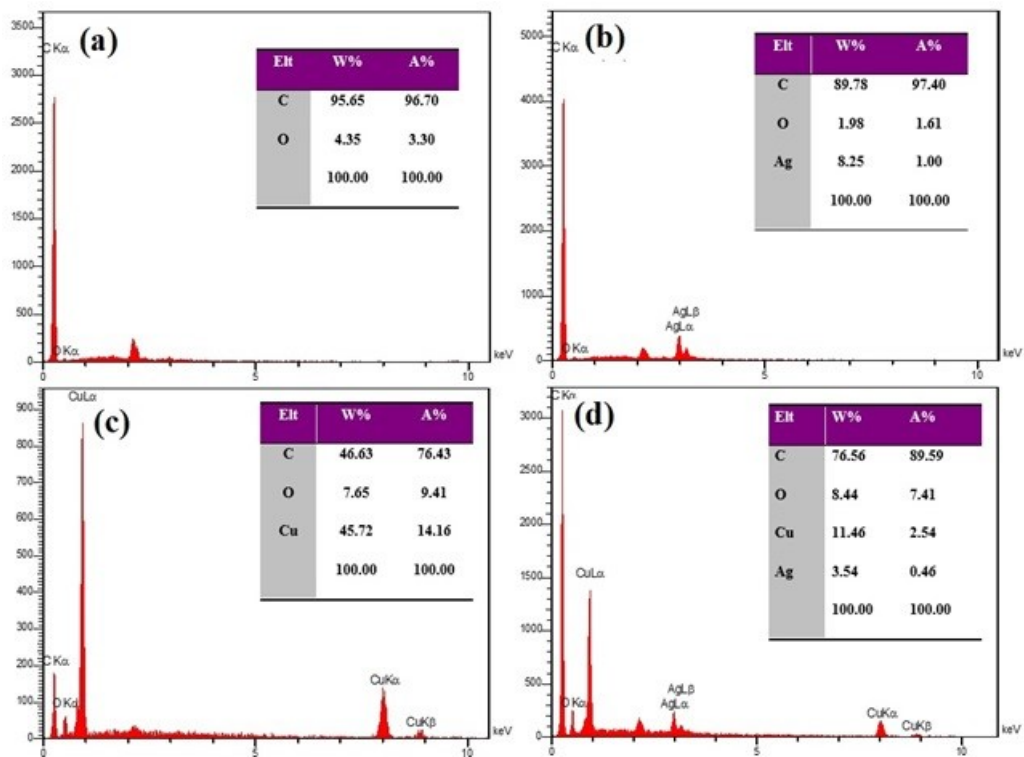

**Fig. S1** EDX spectrum of (a) BNC, (b) Ag NPs/BNC, (c) Cu<sub>2</sub>O/CuO/BNC, and (d) Ag NPs/Cu<sub>2</sub>O/CuO/BNC nanocomposite.

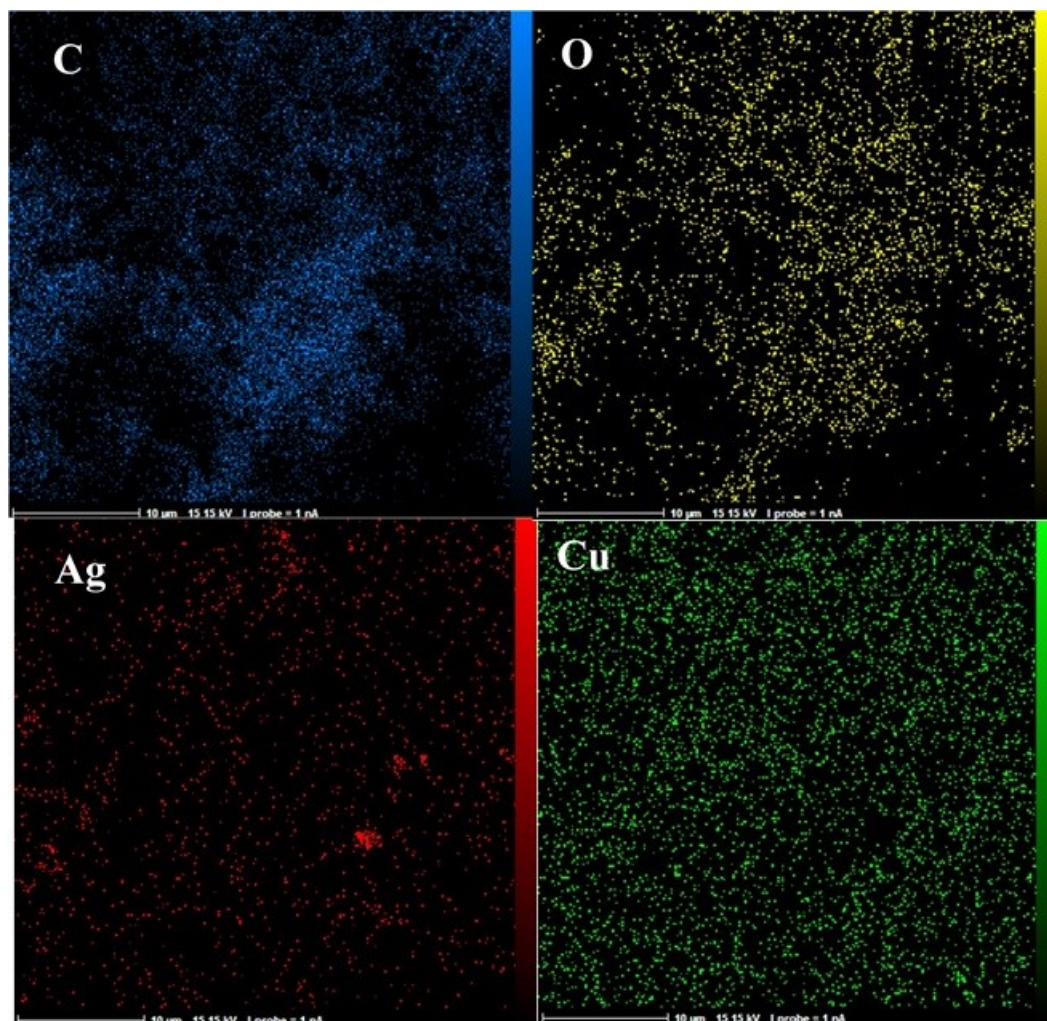

**Fig. S2** Elemental mapping images of Ag NPs/Cu<sub>2</sub>O/CuO/BNC nanocomposite.

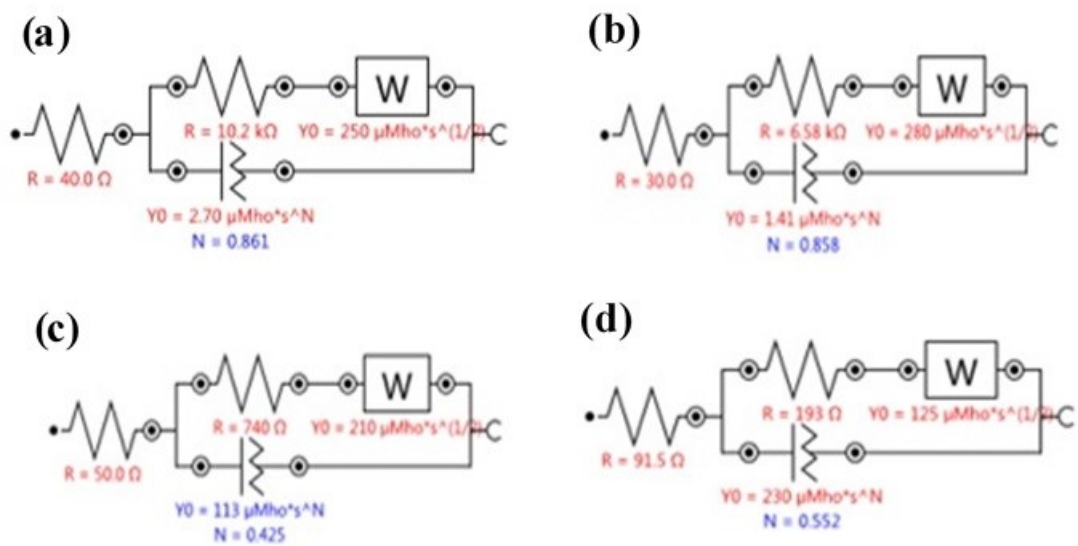

**Fig. S3.** Equivalent circuits of (a) BNC, (b)  $\text{Cu}_2\text{O}/\text{CuO}/\text{BNC}$ , (c) Ag NPs/BNC, and (d) Ag NPs/ $\text{Cu}_2\text{O}/\text{CuO}/\text{BNC}$  nanocomposite.

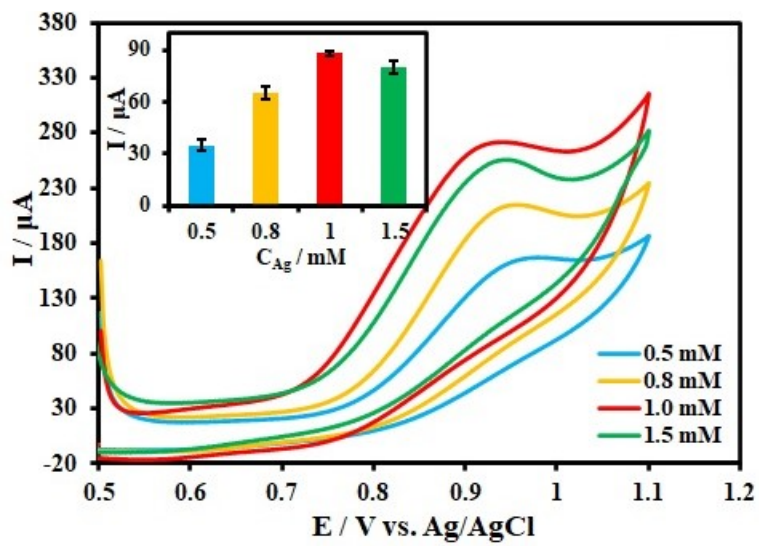

Fig. S4. Optimization of the quantity of AgNO<sub>3</sub> required for deposition of Ag NPs.

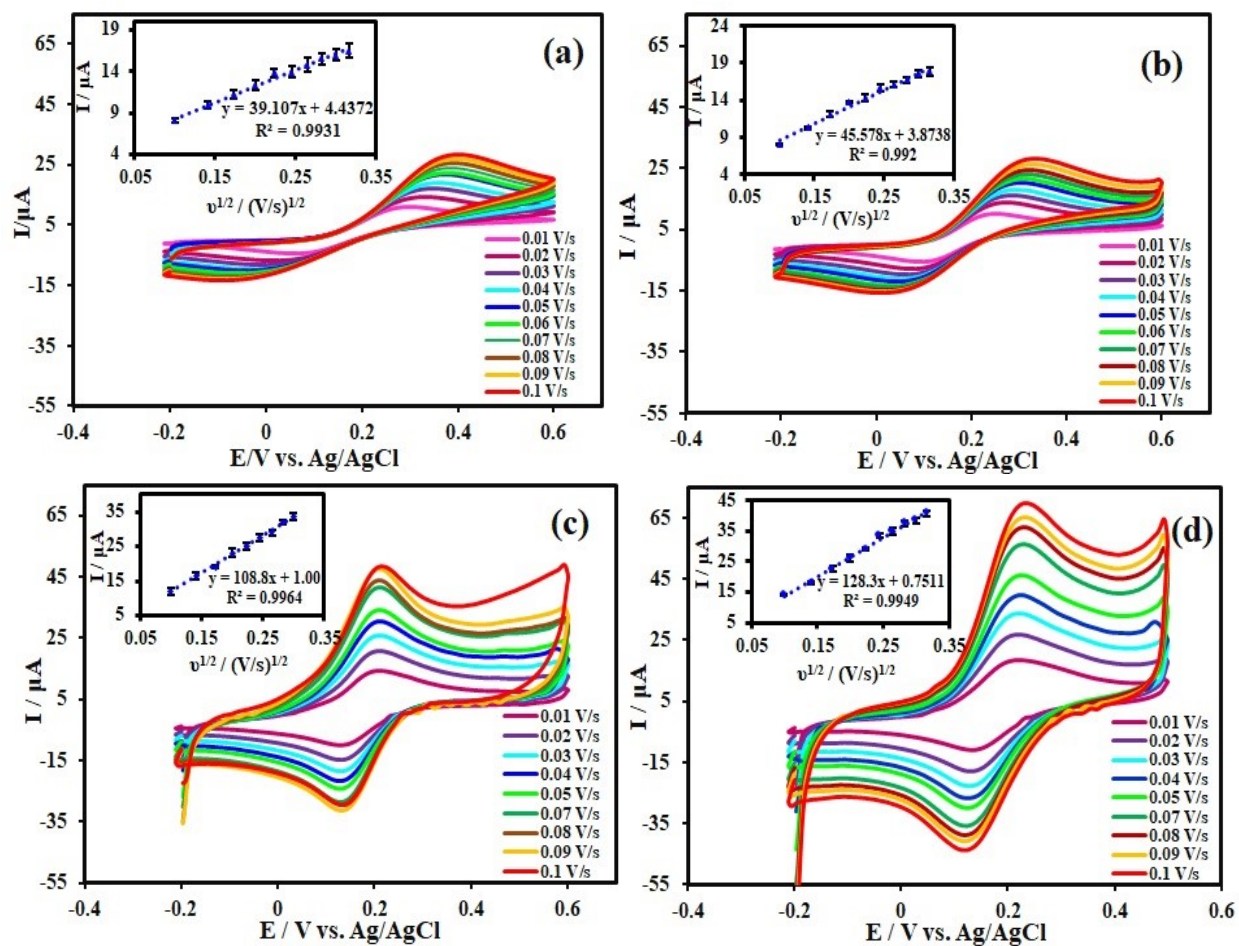

**Fig. S5** Cyclic voltammograms of (a) CPE, (b) BNC/CPE, (c)  $\text{Cu}_2\text{O}/\text{CuO}/\text{BNC}/\text{CPE}$ , and (d) Ag NPs/ $\text{Cu}_2\text{O}/\text{CuO}/\text{BNC}/\text{CPE}$  electrodes in a solution containing 1 mM  $\text{K}_3[\text{Fe}(\text{CN})_6]/\text{K}_4[\text{Fe}(\text{CN})_6]$  in 0.1 M KCl at various scan rates (10-100  $\text{mV s}^{-1}$ ). Inset a plot of  $I_p$  vs.  $v^{1/2}$ .

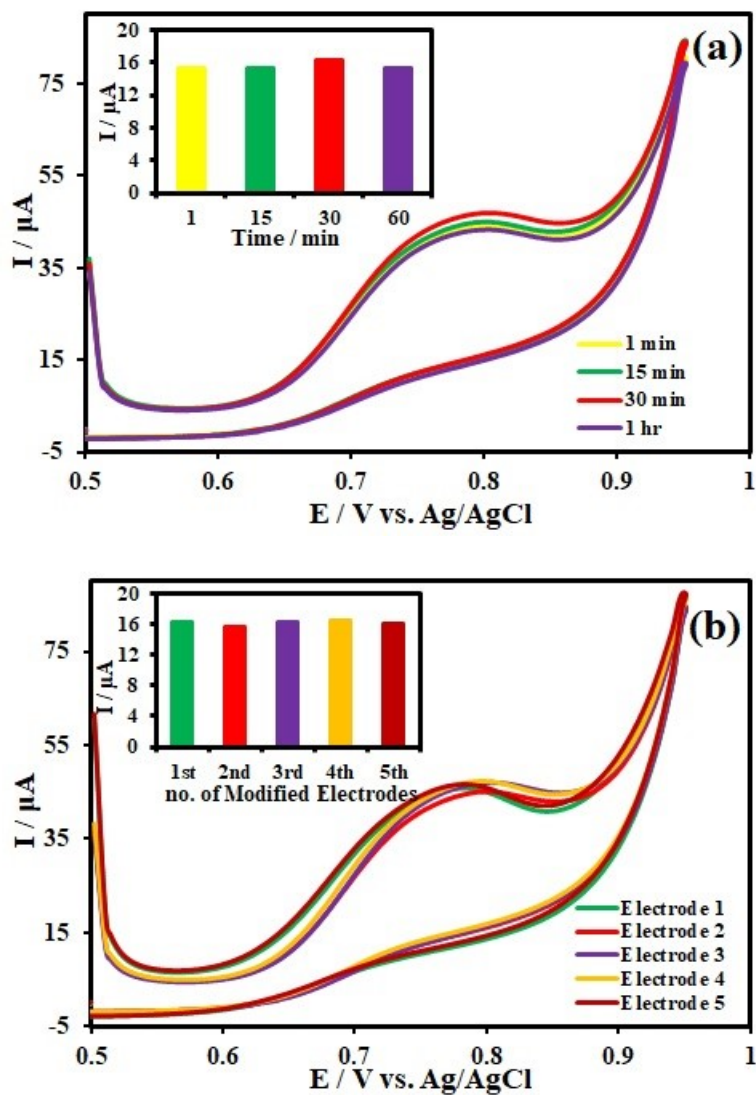

**Fig. S6** CVs of Ag NPs/Cu<sub>2</sub>O/CuO/BNC/CPE in 0.5 mM MET (in 0.04 M BR solution, pH=10.0) in order to investigate: (a) repeatability and (b) reproducibility; the plot of current vs. time; the plot of current vs. number of the electrode.
